# Supplementary material for: Monoclonal Antibodies for Treatment of SARS-CoV-2 Infection During Pregnancy
Source: bioRxiv or medRxiv preprint supplement (doi:10.1101/2022.04.20.22274090), 2022-04-21
Supplement: Supplementary file [file media-2.pdf]

# Supplement 1 - Supplemental Figures and Tables

McCreary EK, Lemon L, Megli C, et al. Monoclonal antibodies for treatment of SARS-CoV-2 infection during pregnancy

## Table of Contents

|                   |                                                                                                                                                                                                                   |           |
|-------------------|-------------------------------------------------------------------------------------------------------------------------------------------------------------------------------------------------------------------|-----------|
| <b>eFigure 1.</b> | Forest Plot of Adjusted Risk Ratios for COVID-19 Associated Outcome from Propensity Score Adjusted Analysis, by Subgroups                                                                                         | <b>2</b>  |
| <b>eFigure 2.</b> | Forest Plot of Adjusted Risk Ratios for Non-COVID-19 Associated Outcome from Propensity Score Adjusted Analysis, by Subgroups                                                                                     | <b>3</b>  |
| <b>eFigure 3.</b> | Cumulative Density Plot of Non-COVID-19 Related Outcome Events, Stratified by Monoclonal Antibody Treatment                                                                                                       | <b>4</b>  |
| <b>eFigure 4.</b> | Histograms of Propensity Scores, Stratified by Monoclonal Antibody Treatment                                                                                                                                      | <b>5</b>  |
| <b>eFigure 5.</b> | Love Plot of Standardized Percent Bias Across Covariates Before and After Propensity Score Matching                                                                                                               | <b>6</b>  |
| <b>eFigure 6.</b> | Histograms of Cohort Accrual Over Time, Stratified by Monoclonal Antibody Treatment                                                                                                                               | <b>7</b>  |
| <b>eFigure 7.</b> | Histograms of Gestational Age at Index Date, Stratified by Monoclonal Antibody Treatment                                                                                                                          | <b>8</b>  |
| <b>eTable 1.</b>  | Comparison of Characteristics of Pregnant mAb Treated vs Non-Treated Persons in Propensity Score-Matched Cohorts                                                                                                  | <b>9</b>  |
| <b>eTable 2.</b>  | Risk-Adjusted Frequency of COVID-19 Associated Outcome or Other Admission Within 28-days of SARS-CoV-2 positive Test or Monoclonal Antibody Infusion in Unvaccinated, Vaccinated, Obese and Non-Obese Pregnancies | <b>10</b> |
| <b>eTable 3.</b>  | Hypertensive Disorder at Delivery Identified by ICD Coding Documented During Delivery Admission                                                                                                                   | <b>11</b> |

**eFigure 1. Forest Plot of Adjusted Risk Ratios for COVID-19 Associated Outcome from Propensity Score Adjusted Analysis, by Subgroups**

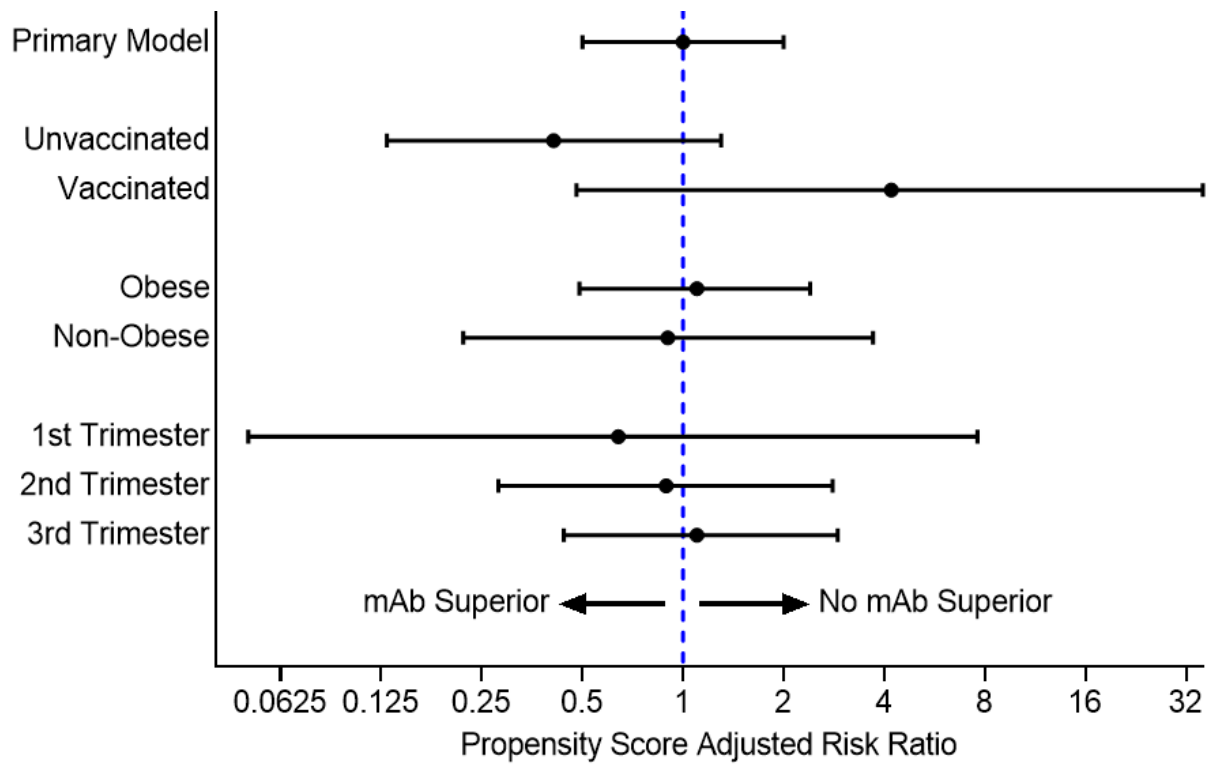

First trimester= <14 weeks gestation  
Second trimester=14 weeks to <27 weeks gestation  
Third trimester= 27+ weeks gestation

*Abbreviations:* mAb: monoclonal antibodies

**eFigure 2. Forest Plot of Adjusted Risk Ratios for Non-COVID-19 Associated Outcome from Propensity Score Adjusted Analysis, by Subgroups**

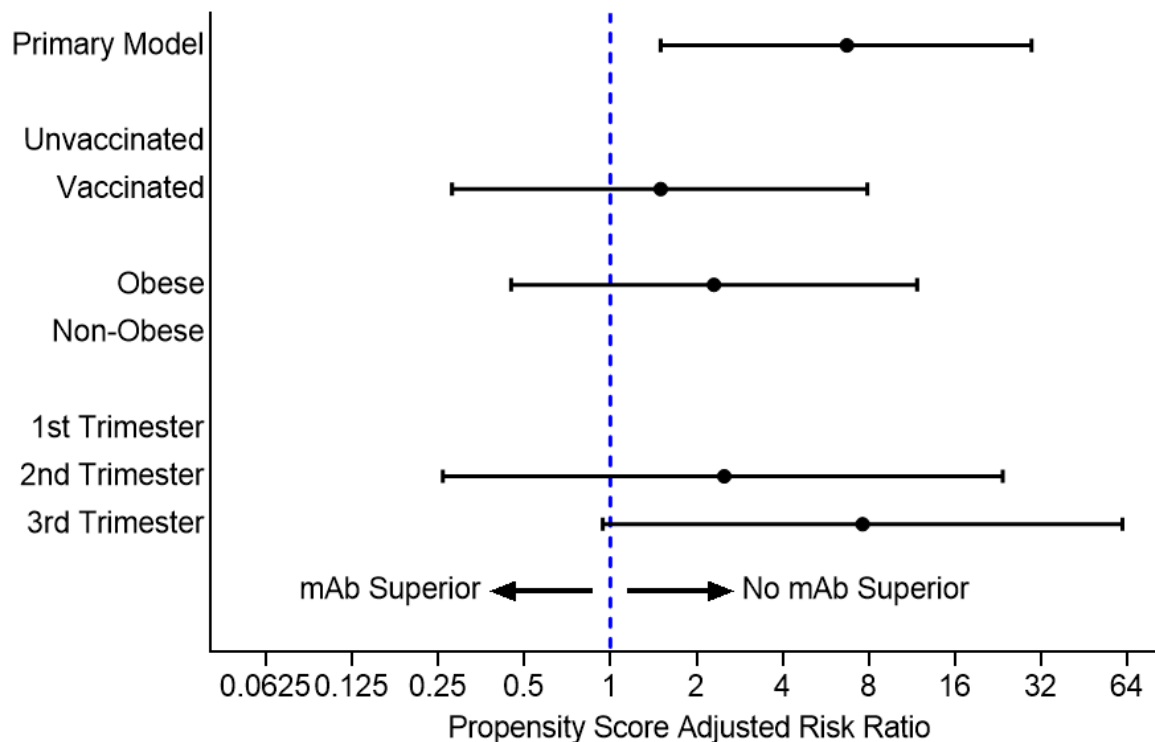

First trimester= <14 weeks gestation  
Second trimester=14 weeks to <27 weeks gestation  
Third trimester= 27+ weeks gestation

*Abbreviations:* mAb: monoclonal antibodies

---

eFigure 3. Cumulative Density Plot of Non-COVID-19 Related Outcome Events, Stratified by Monoclonal Antibody Treatment

---

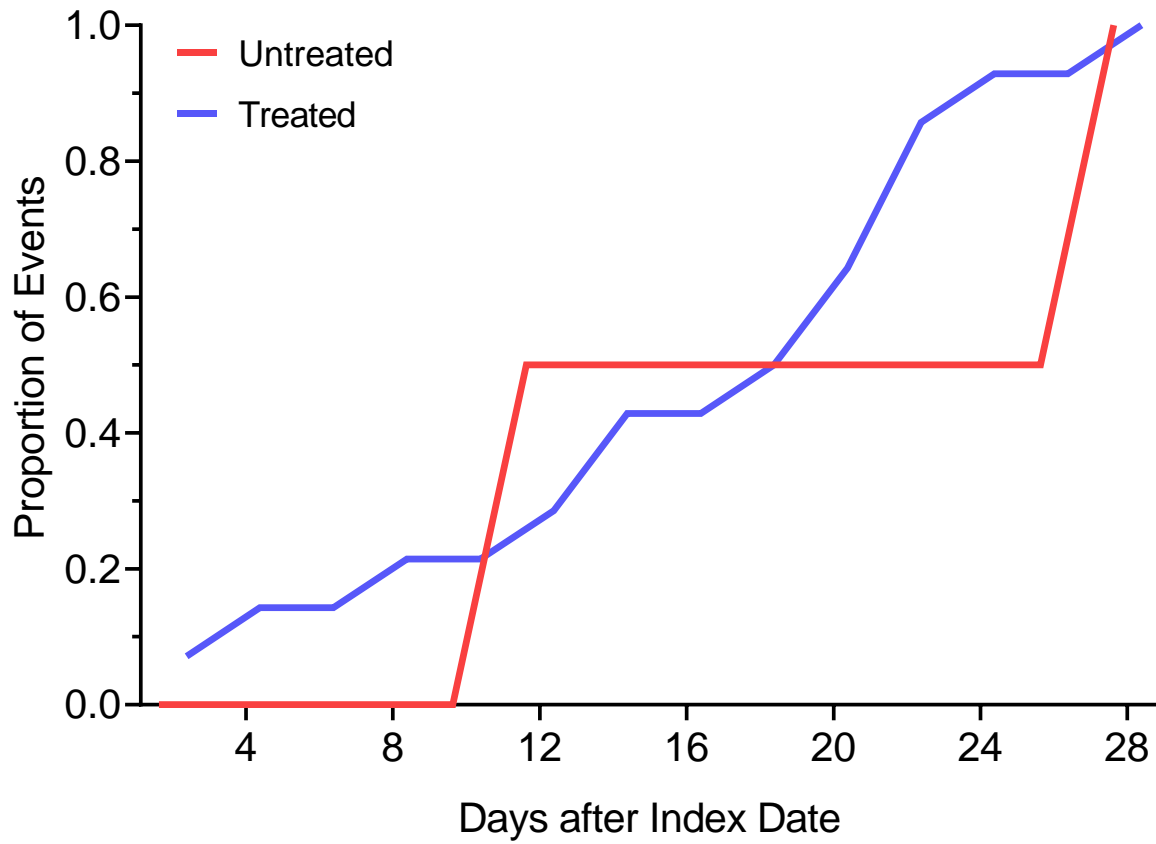

Red represents untreated, blue represents treated with monoclonal antibodies.

---

**eFigure 4. Histograms of Propensity Scores, Stratified by Monoclonal Antibody Treatment**

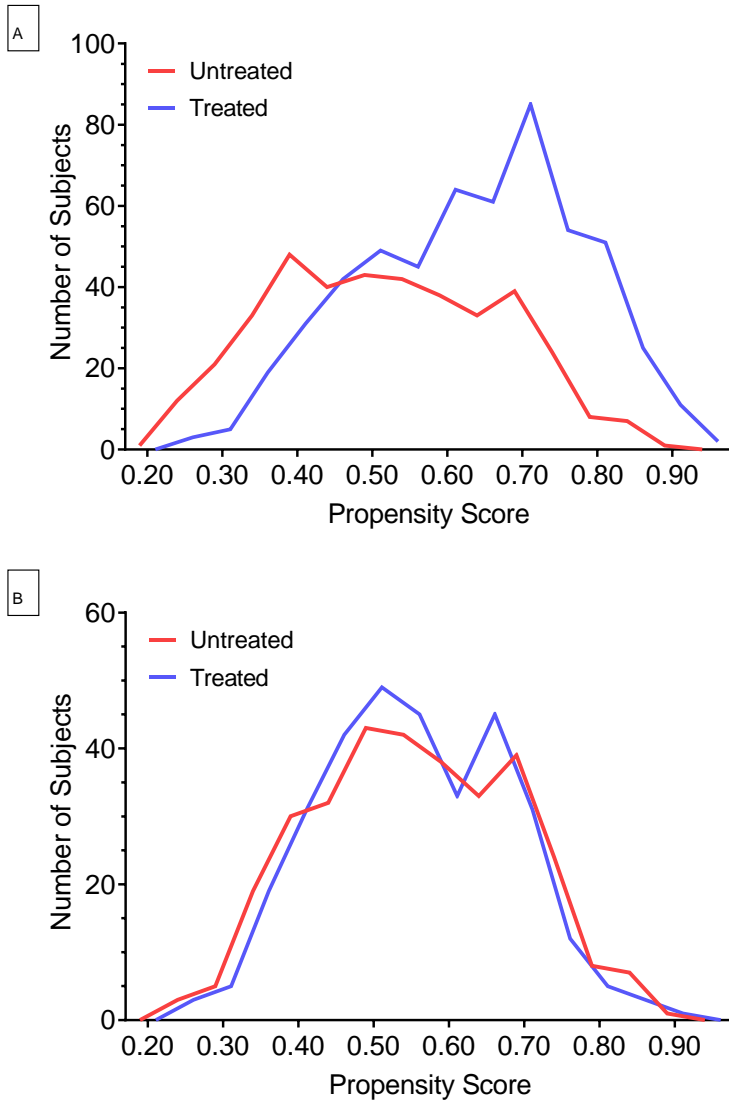

Red represents untreated, blue represents treated with monoclonal antibodies. Panel A represents a histogram of propensity scores for the full cohort (n=944). Panel B represents a histogram of propensity scores for the matched cohort (n=648).

**eFigure 5. Love Plot of Standardized Percent Bias Across Covariates Before and After Propensity Score Matching**

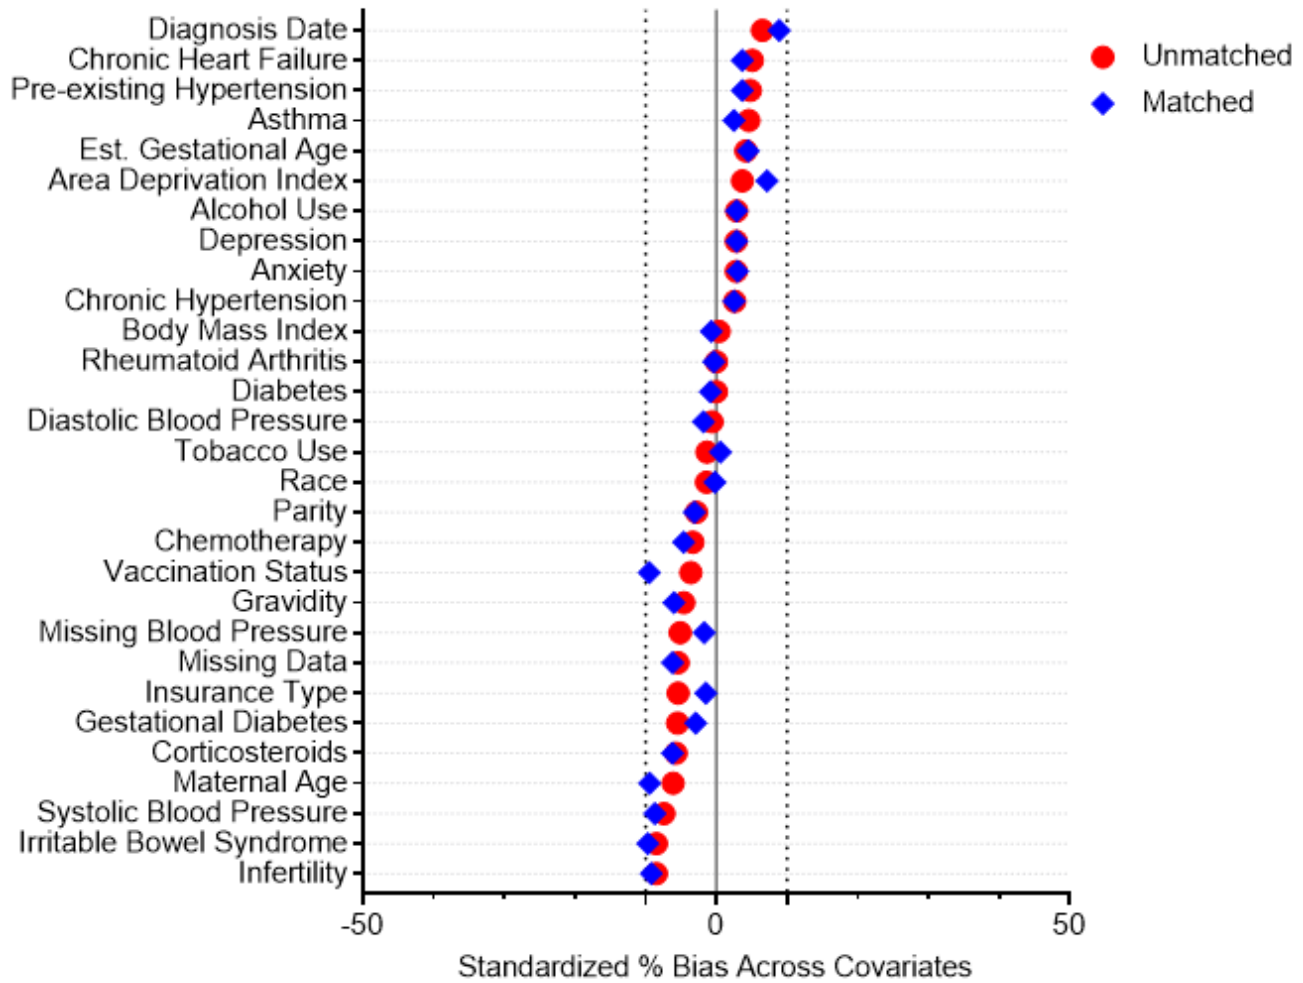

Red circle represents % bias across covariates before propensity score matching. Blue diamond represents % bias across covariates after propensity score matching.

**eFigure 6. Histograms of Cohort Accrual Over Time, Stratified by Monoclonal Antibody Treatment**

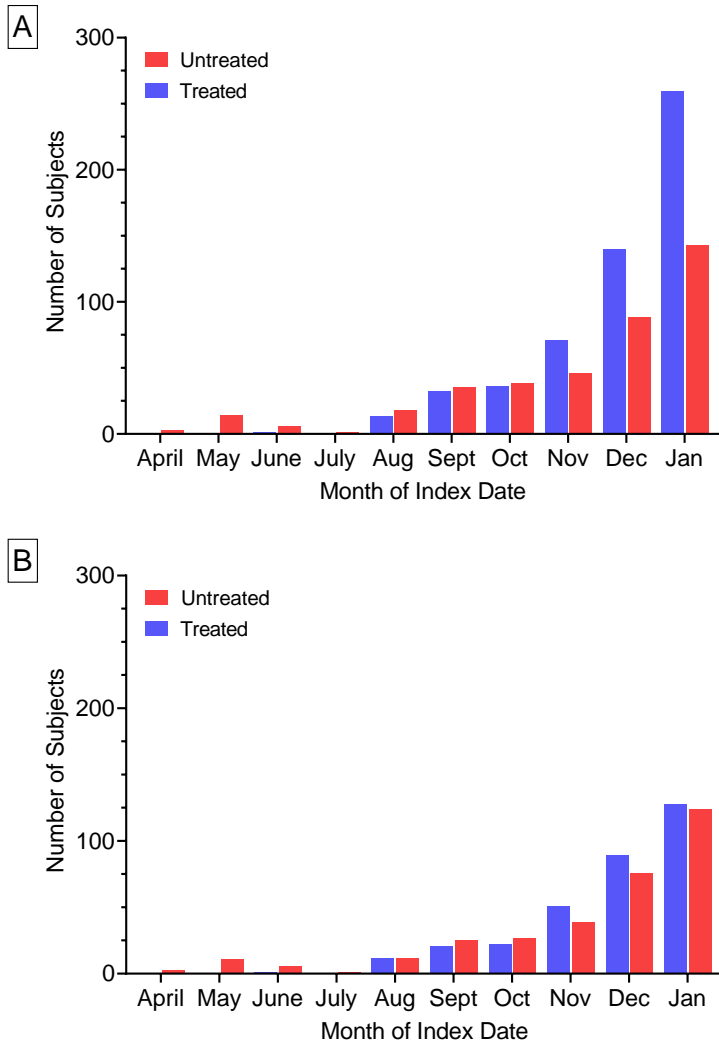

Red represents untreated and blue represents treated with monoclonal antibodies. Panel A represents a histogram of accrual of the full cohort (n=944). Panel B represents a histogram of accrual for the propensity matched cohort (n=648).

**eFigure 7. Histograms of Gestational Age at Index Date, Stratified by Monoclonal Antibody Treatment**

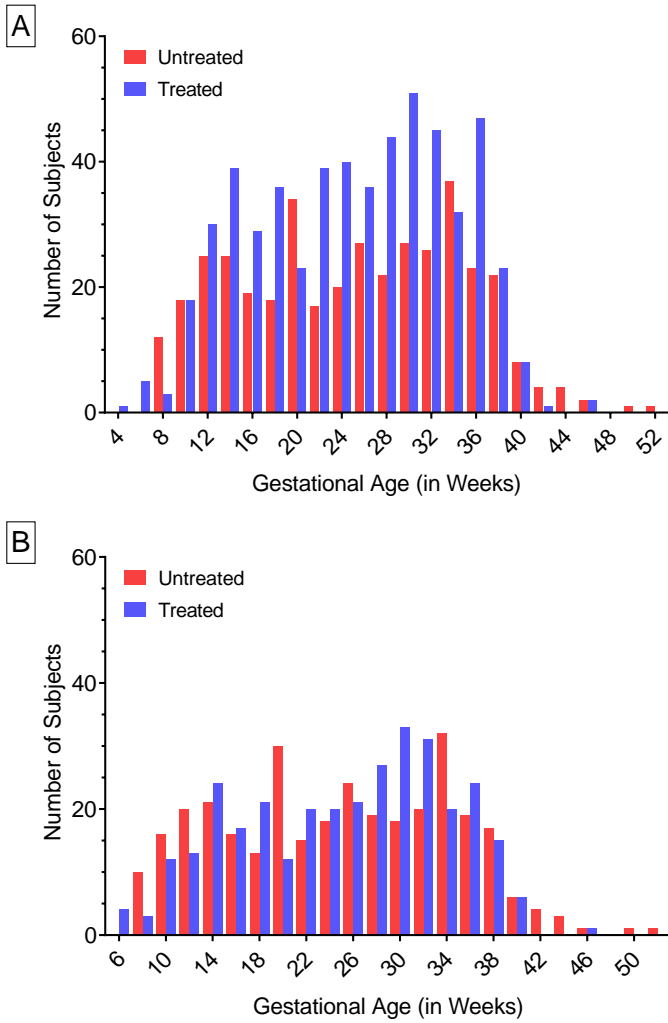

Red represents untreated and blue represents treated with monoclonal antibodies. Panel A represents a histogram of gestational age at index date for the full cohort (n=944). Panel B represents a histogram of gestational age at index date for the propensity matched cohort (n=648).



**eTable 1. Comparison of Characteristics of Pregnant mAb Treated vs. Non-treated Persons in Propensity Score-Matched Cohort**

|                                                                        | All Patients         | Treated           | Non-Treated          | p-value |
|------------------------------------------------------------------------|----------------------|-------------------|----------------------|---------|
| No.                                                                    | 648                  | 324               | 324                  |         |
| <i>Patient Characteristics</i>                                         |                      |                   |                      |         |
| Age, Median (IQR) years                                                | 29.1 (25.2, 33.0)    | 29.0 (24.0, 33.0) | 29.4 (25.8, 33.0)    | 0.37    |
| Race, n (%)                                                            |                      |                   |                      |         |
| White                                                                  | 494 (76.2%)          | 246 (75.9%)       | 248 (76.5%)          | 0.90    |
| Black                                                                  | 134 (20.7%)          | 67 (20.7%)        | 67 (20.7%)           |         |
| Other                                                                  | 20 (3.1%)            | 11 (3.4%)         | 9 (2.8%)             |         |
| Medical History, n (%)                                                 |                      |                   |                      |         |
| Smoking                                                                | 210 (32.4%)          | 104 (32.1%)       | 106 (32.7%)          | 0.87    |
| Diabetes-Pre-gestational                                               | 10 (1.5%)            | 5 (1.5%)          | 5 (1.5%)             | 1.00    |
| Diabetes-Gestational                                                   | 19 (2.9%)            | 8 (2.5%)          | 11 (3.4%)            | 0.48    |
| Asthma                                                                 | 211 (32.6%)          | 109 (33.6%)       | 102 (31.5%)          | 0.56    |
| Hypertension-Preexisting                                               | 25 (3.9%)            | 14 (4.3%)         | 11 (3.4%)            | 0.54    |
| Hypertension-Preeclampsia                                              | 0 (0)                | 0 (0)             | 0 (0.0)              | NA      |
| Infertility                                                            | 45 (6.9%)            | 19 (5.9%)         | 26 (8.0%)            | 0.28    |
| Other obstetric conditions                                             | 40 (6.2%)            | 22 (6.8%)         | 18 (5.6%)            | 0.51    |
| Cancer                                                                 | 2 (0.3%)             | 0 (0.0%)          | 2 (0.6%)             | 0.16    |
| Chemotherapy                                                           | 24 (3.7%)            | 11 (3.4%)         | 13 (4.0%)            | 0.68    |
| Other chronic conditions                                               | 38 (5.9%)            | 20 (6.2%)         | 18 (5.6%)            | 0.74    |
| Corticosteroid treatment                                               | 76 (11.7%)           | 35 (10.8%)        | 41 (12.7%)           | 0.46    |
| Vaccination status, n (%)                                              |                      |                   |                      |         |
| Unvaccinated                                                           | 143 (22.1%)          | 91 (28.1%)        | 52 (16.0%)           | 0.001   |
| Partially vaccinated                                                   | 40 (6.2%)            | 23 (7.1%)         | 17 (5.2%)            |         |
| Fully vaccinated                                                       | 222 (34.3%)          | 100 (30.9%)       | 122 (37.7%)          |         |
| Unknown/not determined                                                 | 243 (37.5%)          | 110 (34.0%)       | 133 (41.0%)          |         |
| Charlson Comorbidity Index Score, Median (IQR)                         | 0 (0, 0)             | 0 (0, 0)          | 0 (0, 0)             | 0.94    |
| Body mass index, Median (IQR)                                          | 30.2 (26.6, 34.3)    | 31 (26.7, 33.6)   | 30 (26.4, 34.5)      | 0.77    |
| Gestational age at COVID-19 diagnosis or infusion (days), Median (IQR) | 180.5 (120.0, 228.5) | 187 (125, 223.5)  | 175.5 (117.5, 231.5) | 0.51    |
| Trimester, n (%)                                                       |                      |                   |                      |         |
| First trimester                                                        | 102 (15.7%)          | 43 (13.3%)        | 59 (18.2%)           | 0.19    |
| Second trimester                                                       | 248 (38.3%)          | 124 (38.3%)       | 124 (38.3%)          |         |
| Third trimester                                                        | 298 (46.0%)          | 157 (48.5%)       | 141 (43.5%)          |         |
| Nulliparous, n (%)                                                     | 223 (34.4%)          | 113 (34.9%)       | 110 (34.0%)          | 0.80    |
| Early miscarriage, n (%)                                               | 6 (0.9%)             | 4 (1.2%)          | 2 (0.6%)             | 0.41    |
| Insurance type, n (%)                                                  |                      |                   |                      |         |
| Commercial                                                             | 381 (58.8%)          | 193 (59.6%)       | 188 (58.0%)          | 0.65    |
| Public                                                                 | 221 (34.1%)          | 111 (34.3%)       | 110 (34.0%)          |         |
| Self-pay/Other                                                         | 46 (7.1%)            | 20 (6.2%)         | 26 (8.0%)            |         |
| Area Deprivation Index, Median (IQR)                                   | 71 (53, 86)          | 70 (53, 86)       | 71 (53, 86)          | 0.77    |

**eTable 2. Risk-Adjusted Frequency of COVID-19 Associated Outcome or Other Admission Within 28-days of SARS-CoV-2 Positive Test or Monoclonal Antibody Infusion in Unvaccinated, Vaccinated, Obese, and Non-Obese Pregnancies**

| Model               | No. | Total Visits/Total No. (%) |               | Risk-Adjusted 28-day COVID visit, per 100 people (95%CI) |                   | Risk Difference, per 100 people (95% CI) | Risk Ratio (95% CI) |
|---------------------|-----|----------------------------|---------------|----------------------------------------------------------|-------------------|------------------------------------------|---------------------|
|                     |     | Treated                    | Non-treated   | Treated                                                  | Non-treated       |                                          |                     |
| <i>Unvaccinated</i> |     |                            |               |                                                          |                   |                                          |                     |
| COVID-associated    |     |                            |               |                                                          |                   |                                          |                     |
| Crude               | 178 | 5/122 (4.1%)               | 6/56 (10.7%)  | 4.1 (0.58, 7.6)                                          | 10.7 (2.6, 18.8)  | -6.6 (-15.5, 2.2)                        | 0.38 (0.12, 1.2)    |
| PS-adjusted         | 177 | 5/121 (4.1%)               | 6/56 (10.7%)  | 4.2 (0.61, 7.8)                                          | 10.2 (2.5, 18.0)  | -6.0 (-14.5, 2.5)                        | 0.41 (0.13, 1.3)    |
| Other admission     |     |                            |               |                                                          |                   |                                          |                     |
| Crude               | 178 | 6/122 (4.9%)               | 0             | ---                                                      | ---               | ---                                      | ---                 |
| PS-adjusted         | 177 | 6/121 (5.0%)               | 0             | ---                                                      | ---               | ---                                      | ---                 |
| <i>Vaccinated</i>   |     |                            |               |                                                          |                   |                                          |                     |
| COVID-associated    |     |                            |               |                                                          |                   |                                          |                     |
| Crude               | 392 | 6/265 (2.3%)               | 1/127 (0.79%) | 2.3 (0.47, 4.1)                                          | 0.79 (-0.75, 2.3) | 1.5 (-0.88, 3.8)                         | 2.9 (0.35, 23.6)    |
| PS-adjusted         | 387 | 6/262 (2.3%)               | 1/125 (0.8%)  | 2.6 (0.53, 4.7)                                          | 0.63 (-0.61, 1.9) | 2.0 (-0.47, 4.4)                         | 4.2 (0.48, 35.9)    |
| Other admission     |     |                            |               |                                                          |                   |                                          |                     |
| Crude               | 392 | 6/265 (2.3%)               | 2/127 (1.6%)  | 2.3 (0.47, 4.1)                                          | 1.6 (-0.59, 3.7)  | 0.69 (-2.1, 3.5)                         | 1.4 (0.29, 7.0)     |
| PS-adjusted         | 387 | 6/262 (2.3%)               | 2/125 (1.6%)  | 2.3 (0.47, 4.2)                                          | 1.5 (-0.61, 3.7)  | 0.80 (-2.1, 3.7)                         | 1.5 (0.30, 7.7)     |
| <i>Obese</i>        |     |                            |               |                                                          |                   |                                          |                     |
| COVID-associated    |     |                            |               |                                                          |                   |                                          |                     |
| Crude               | 569 | 13/337 (3.9%)              | 13/232 (5.6%) | 3.9 (1.8, 5.9)                                           | 5.6 (2.6, 8.6)    | -1.8 (-5.4, 1.9)                         | 0.69 (0.33, 1.5)    |
| PS-adjusted         | 560 | 13/332 (3.9%)              | 12/228 (5.3%) | 4.7 (2.2, 7.2)                                           | 4.3 (1.8, 6.7)    | 0.39 (-3.2, 4.0)                         | 1.1 (0.49, 2.4)     |
| Other admission     |     |                            |               |                                                          |                   |                                          |                     |
| Crude               | 569 | 10/337 (3.0%)              | 2/232 (0.86%) | 3.0 (1.2, 4.8)                                           | 0.86 (-0.33, 2.1) | 2.1 (-0.06, 4.3)                         | 3.4 (0.76, 15.6)    |
| PS-adjusted         | 560 | 10/332 (3.0%)              | 2/228 (0.88%) | 3.0 (1.1, 4.9)                                           | 0.88 (-0.35, 2.1) | 2.1 (-0.19, 4.4)                         | 3.4 (0.71, 16.1)    |
| <i>Non-Obese</i>    |     |                            |               |                                                          |                   |                                          |                     |
| COVID-associated    |     |                            |               |                                                          |                   |                                          |                     |
| Crude               | 375 | 4/215 (1.9%)               | 4/160 (2.5%)  | 1.9 (0.05, 3.7)                                          | 2.5 (0.08, 4.9)   | -0.6 (-3.7, 2.4)                         | 0.74 (0.19, 2.9)    |
| PS-adjusted         | 370 | 4/215 (1.9%)               | 4/155 (2.6%)  | 2.1 (0.04, 4.1)                                          | 2.3 (0.03, 4.5)   | -0.22 (-3.3, 2.8)                        | 0.90 (0.22, 3.7)    |
| Other admission     |     |                            |               |                                                          |                   |                                          |                     |
| Crude               | 375 | 7/215 (3.3%)               | 0             | ---                                                      | ---               | ---                                      | ---                 |
| PS-adjusted         | 370 | 7/215 (3.3%)               | 0             | ---                                                      | ---               | ---                                      | ---                 |

---

**eTable 3. Hypertensive Disorder At Delivery Identified by the following ICD Coding Documented During Delivery Admission**

| Codes: |        |        |        |       |        |       |        |        |        |
|--------|--------|--------|--------|-------|--------|-------|--------|--------|--------|
| O10011 | O10919 | O1492  | O1493  | O1494 | O1495  | O1500 | O1502  | O1503  | O151   |
| O10012 | O1092  | O152   | O159   | O161  | O162   | O163  | O164   | O165   | O169   |
| O10013 | O1093  | O1422  | O1042  | O1412 | O1032  | O1402 | O1022  | O133   | O10119 |
| O10019 | O111   | O1423  | O1043  | O1413 | O1033  | O1403 | O1023  | O134   | O10211 |
| O1002  | O112   | O1424  | O10911 | O1414 | O10411 | O1404 | O10311 | O135   | O10212 |
| O1003  | O113   | O1425  | O10912 | O1415 | O10412 | O1405 | O10312 | O139   | O10213 |
| O10111 | O114   | O1490  | O10913 | O1420 | O10413 | O1410 | O10313 | O1400  |        |
| O10112 | O115   | O10113 | O119   | O1012 | O131   | O1013 | O132   | O10219 |        |

---
